# Supplementary material
Source: HighWire-hosted journal article supplement (https://bmjopen.bmj.com/content/14/2/e074952)
Supplement: inline-supplementary-material-2 [file inline-supplementary-material-2.pdf]

Appendix 2

Draft Search Strategy

| Dates of coverage and database | Query                                                                                                                                                                                                                                                                                                                                                                                                                                                                                                                                                  | Retrieved records |
|--------------------------------|--------------------------------------------------------------------------------------------------------------------------------------------------------------------------------------------------------------------------------------------------------------------------------------------------------------------------------------------------------------------------------------------------------------------------------------------------------------------------------------------------------------------------------------------------------|-------------------|
| 09/21/22<br><br>CINAHL         | 1. MH (pain management or pain relief or pain control or pain reduction or managing pain or analgesia) OR TI (pain management or pain relief or pain control or pain reduction or managing pain or analgesia) OR AB (pain management or pain relief or pain control or pain reduction or managing pain or analgesia)                                                                                                                                                                                                                                   | 84,304            |
|                                | 2. MH (pain assessment or pain scale or pain tool or pain assessment tool or pain instrument or pain intervention or pain measurement) OR TI (pain assessment or pain scale or pain tool or pain assessment tool or pain instrument or pain intervention or pain measurement) OR AB (pain assessment or pain scale or pain tool or pain assessment tool or pain instrument or pain intervention or pain measurement)                                                                                                                                   | 75,339            |
|                                | 3. 1 OR 2                                                                                                                                                                                                                                                                                                                                                                                                                                                                                                                                              | 133,679           |
|                                | 4. MH (integrative medicine or complementary medicine or alternative medicine) OR TI (integrative medicine or complementary medicine or alternative medicine) OR AB (integrative medicine or complementary medicine or alternative medicine)                                                                                                                                                                                                                                                                                                           | 16,007            |
|                                | 5. MH ( integrative therapy or integrative therapies or complementary therapy or complementary therapies or alternative therapy or alternative therapies or alternative treatment) OR TI (integrative therapy or integrative therapies or complementary therapy or complementary therapies or alternative therapy or alternative therapies or alternative treatment) OR AB (integrative therapy or integrative therapies or complementary therapy or complementary therapies or alternative therapy or alternative therapies or alternative treatment) | 60,250            |
|                                | 6. MH (non- pharmacological intervention or non-pharmacological interventions or non-pharmacological therapy or non-pharmacological therapies or non-pharmacological treatment) OR TI (non- pharmacological intervention or                                                                                                                                                                                                                                                                                                                            | 3,068             |

|  |                                                                                                                                                                                                                                                                                                                     |        |
|--|---------------------------------------------------------------------------------------------------------------------------------------------------------------------------------------------------------------------------------------------------------------------------------------------------------------------|--------|
|  | non-pharmacological interventions or non-pharmacological therapy or non-pharmacological therapies or non-pharmacological treatment) OR AB (non- pharmacological intervention or non-pharmacological interventions or non-pharmacological therapy or non-pharmacological therapies or non-pharmacological treatment) |        |
|  | 7. MH (aromatherapy or essential oils or aroma therapy) OR TI (aromatherapy or essential oils or aroma therapy) OR AB (aromatherapy or essential oils or aroma therapy                                                                                                                                              | 7,565  |
|  | 8. MH (acupuncture or acupuncture therapy or acupuncture treatment) OR TI (acupuncture or acupuncture therapy or acupuncture treatment) OR AB (acupuncture or acupuncture therapy or acupuncture treatment)                                                                                                         | 20,538 |
|  | 9. MH acupuncture, ear OR TI acupuncture, ear OR AB acupuncture, ear                                                                                                                                                                                                                                                | 590    |
|  | 10. MH (mind body techniques or mind-body therapies) OR TI (mind body techniques or mind-body therapies) OR AB (mind body techniques or mind-body therapies)                                                                                                                                                        | 3,952  |
|  | 11. MH (breathing techniques or breathing or breathing exercise) OR TI (breathing techniques or breathing or breathing exercise) OR AB (breathing techniques or breathing or breathing exercise)                                                                                                                    | 20,189 |
|  | 12. MH (guided imagery for pain management or guided image therapy or guided images therapies) OR TI (guided imagery for pain management or guided image therapy or guided images therapies) OR AB (guided imagery for pain management or guided image therapy or guided images therapies)                          | 646    |
|  | 13. MH (guided imagery or guided relaxation or visualization techniques) OR TI (guided imagery or guided relaxation or visualization techniques) OR AB (guided imagery or guided relaxation or visualization techniques)                                                                                            | 4,120  |
|  | 14. MH (hypnosis or hypnotherapy) OR TI (hypnosis or hypnotherapy) OR AB (hypnosis or hypnotherapy)                                                                                                                                                                                                                 | 4,011  |

|  |                                                                                                                                                                                                                                                                                                                                                                                                                       |         |
|--|-----------------------------------------------------------------------------------------------------------------------------------------------------------------------------------------------------------------------------------------------------------------------------------------------------------------------------------------------------------------------------------------------------------------------|---------|
|  | 15. MH (biofeedback or biofeedback therapy) OR TI (biofeedback or biofeedback therapy) OR AB (biofeedback or biofeedback therapy)                                                                                                                                                                                                                                                                                     | 4,994   |
|  | 16. MH (music therapy or music intervention or musical therapy or music-based intervention or therapeutic music) OR TI (music therapy or music intervention or musical therapy or music-based intervention or therapeutic music ) OR AB (music therapy or music intervention or musical therapy or music-based intervention or therapeutic music )                                                                    | 7,558   |
|  | 17. MH (progressive muscle relaxation or muscle relaxation) OR TI (progressive muscle relaxation or muscle relaxation) OR AB (progressive muscle relaxation or muscle relaxation)                                                                                                                                                                                                                                     | 2,299   |
|  | 18. MH (sleep therapy or sleep) OR TI (sleep therapy or sleep) OR AB (sleep therapy or sleep)                                                                                                                                                                                                                                                                                                                         | 77,183  |
|  | 19. MH (massage therapy or massage or massage therapies) OR TI (massage therapy or massage or massage therapies) OR AB (massage therapy or massage or massage therapies)                                                                                                                                                                                                                                              | 21,418  |
|  | 20. MH (physical therapy or physiotherapy) OR TI (physical therapy or physiotherapy) OR AB (physical therapy or physiotherapy)                                                                                                                                                                                                                                                                                        | 61,296  |
|  | 21. 4 OR 5 OR 6 OR 7 OR 8 OR 9 OR 10 OR 11 OR 12 OR 13 OR 14 OR15 OR S16 OR 17 OR 18 OR 19 OR 20                                                                                                                                                                                                                                                                                                                      | 277,529 |
|  | 22. MH (pediatric intensive care unit or picu or pediatric critical care unit or paediatric intensive care or paediatric critical care) OR TI (pediatric intensive care unit or picu or pediatric critical care unit or paediatric intensive care or paediatric critical care) OR AB (pediatric intensive care unit or picu or pediatric critical care unit or paediatric intensive care or paediatric critical care) | 9,239   |
|  | 23. MH intensive care units, pediatric OR TI intensive care units, pediatric OR AB intensive care units, pediatric                                                                                                                                                                                                                                                                                                    | 8,949   |

|  |                     |        |
|--|---------------------|--------|
|  | 24. 22 OR 23        | 11,491 |
|  | 25. 3 AND 21 AND 24 | 38     |

| Dates of coverage and database          | Query                                                                                                                                                                                                                                                                                                                                                                                                                                                                                                                                                                                              | Retrieved records |
|-----------------------------------------|----------------------------------------------------------------------------------------------------------------------------------------------------------------------------------------------------------------------------------------------------------------------------------------------------------------------------------------------------------------------------------------------------------------------------------------------------------------------------------------------------------------------------------------------------------------------------------------------------|-------------------|
| 09/21/22<br><br>MEDLINE<br><br>(PubMed) | 1. "pain management"[MeSH Terms] OR "pain management"[Text Word] OR "pain relief"[Text Word] OR "pain control"[Text Word] OR "pain reduction"[Text Word] OR "managing pain"[Text Word] OR "analgesia"[MeSH Terms] OR "analgesia"[Text Word]                                                                                                                                                                                                                                                                                                                                                        | 177,128           |
|                                         | 2. "pain measurement"[MeSH Terms] OR "pain assessment"[Text Word] OR "pain measurement"[MeSH Terms] OR "pain scale"[Text Word] OR "pain tool"[Text Word] OR "pain assessment tool"[Text Word] OR "pain instrument"[Text Word] OR "pain intervention"[Text Word] OR "pain measurement"[MeSH Terms] OR "pain measurement"[Text Word]                                                                                                                                                                                                                                                                 | 101,025           |
|                                         | 3. 1 OR 2                                                                                                                                                                                                                                                                                                                                                                                                                                                                                                                                                                                          | 246,193           |
|                                         | 4. "integrative medicine"[MeSH Terms] OR "integrative medicine"[Text Word] OR "complementary therapies"[MeSH Terms] OR "complementary medicine"[Text Word] OR "complementary therapies"[MeSH Terms] OR "alternative medicine"[Text Word] OR "integrative therapy"[Text Word] OR "integrative therapies"[Text Word] OR "complementary therapy"[Text Word] OR "complementary therapies"[MeSH Terms] OR "complementary therapies"[Text Word] OR "alternative therapy"[Text Word] OR "complementary therapies"[MeSH Terms] OR "alternative therapies"[Text Word] OR "alternative treatment"[Text Word] | 274,042           |
|                                         | 5. "nonpharmacological intervention"[Text Word] OR "nonpharmacological interventions"[Text Word] OR "nonpharmacological therapy"[Text Word] OR "nonpharmacological therapies"[Text Word] OR "nonpharmacological treatment"[Text Word]                                                                                                                                                                                                                                                                                                                                                              | 5,292             |

|     |                                                                                                                                                                                                                                                                             |                |
|-----|-----------------------------------------------------------------------------------------------------------------------------------------------------------------------------------------------------------------------------------------------------------------------------|----------------|
| 6.  | "aromatherapy"[MeSH Terms] OR "aromatherapy"[Text Word] OR "oils, volatile"[MeSH Terms] OR "essential oils"[Text Word] OR "aromatherapy"[MeSH Terms] OR "aroma therapy"[Text Word]                                                                                          | 23,007         |
| 7.  | "acupuncture"[MeSH Terms] OR "acupuncture therapy"[MeSH Terms] OR "acupuncture"[Text Word] OR "acupuncture therapy"[MeSH Terms] OR "acupuncture therapy"[Text Word] OR "acupuncture treatment"[Text Word] OR "acupuncture, ear"[MeSH Terms] OR "acupuncture ear"[Text Word] | 35,397         |
| 8.  | "mind body techniques"[Text Word] OR "mind body therapies"[MeSH Terms] OR "mind body therapies"[Text Word]                                                                                                                                                                  | <u>46,477</u>  |
| 9.  | "breathing techniques"[Text Word] OR "breathing exercises"[MeSH Terms] OR "breathing exercise"[Text Word]                                                                                                                                                                   | <u>4,632</u>   |
| 10. | "guided imagery intervention"[Text Word] OR "guided imagery interventions"[Text Word] OR "imagery, psychotherapy"[MeSH Terms] OR "guided imagery"[Text Word] OR "guided relaxation"[Text Word]                                                                              | 2,746          |
| 11. | "hypnosis"[MeSH Terms] OR "hypnosis"[Text Word] OR "hypnotherapy"[Text Word]                                                                                                                                                                                                | 15,942         |
| 12. | "biofeedback, psychology"[MeSH Terms] OR "biofeedback"[Text Word] OR "biofeedback therapy"[Text Word]                                                                                                                                                                       | <u>16,054</u>  |
| 13. | "music therapy"[MeSH Terms] OR "music therapy"[Text Word] OR "music intervention"[Text Word] OR "musical therapy"[Text Word] OR "music based intervention"[Text Word] OR "therapeutic music"[Text Word]                                                                     | 5,367          |
| 14. | "progressive muscle relaxation"[Text Word] OR "muscle relaxation"[MeSH Terms] OR "muscle relaxation"[Text Word]                                                                                                                                                             | <u>35,626</u>  |
| 15. | "sleep therapy"[Text Word] OR "sleep"[MeSH Terms] OR "sleep"[Text Word]                                                                                                                                                                                                     | <u>232,994</u> |

|  |                                                                                                                                                                                                            |         |
|--|------------------------------------------------------------------------------------------------------------------------------------------------------------------------------------------------------------|---------|
|  | 16. "massage therapy"[Text Word] OR "massage"[Text Word] OR "massage therapies"[Text Word]                                                                                                                 | 16,186  |
|  | 17. "physical therapy modalities"[MeSH Terms] OR "physical therapy"[Text Word] OR "physical therapy modalities"[MeSH Terms] OR "physiotherapy"[Text Word]                                                  | 200,591 |
|  | 18. 4 OR 5 OR 6 OR 7 OR 8OR 9 OR 10 OR 11 OR 12 OR 13 OR 14 OR 15 OR 16 OR 17                                                                                                                              | 746,903 |
|  | 19. "pediatric intensive care unit"[Text Word] OR "picu"[Text Word] OR "pediatric critical care unit"[Text Word] OR "paediatric critical care"[Text Word] OR "intensive care units, pediatric"[MeSH Terms] | 31,624  |
|  | 20. 3 AND 18 AND 19                                                                                                                                                                                        | 63      |

| Dates of coverage and database         | Query                                                                                                                                                             | Retrieved records |
|----------------------------------------|-------------------------------------------------------------------------------------------------------------------------------------------------------------------|-------------------|
| 09/14/22<br>ACADEMIC<br>SEARCH PREMIER | 1. (pain management) OR (DE "PAIN management" OR DE "DRY needling" OR DE "PAIN measurement" OR DE "BRIEF Pain Inventory" OR DE "MCGILL Pain Questionnaire")       | 81,825            |
|                                        | 2. DE "ALTERNATIVE medicine" OR DE "ACUPUNCTURE" OR DE "ALTERNATIVE treatment" OR DE "BOTANIC medicine" OR DE "CHIROPRACTIC" OR DE "CHRONOTHERMAL medicine" OR DE | 38,185            |

|  |                                                                                                                                |        |
|--|--------------------------------------------------------------------------------------------------------------------------------|--------|
|  | "DRY needling" OR DE "ENERGY medicine" OR DE "HOLISTIC medicine" OR DE "HOMEOPATHY" OR DE "MENTAL healing" OR DE "NATUROPATHY" |        |
|  | 3. DE "PEDIATRIC intensive care" OR ""PEDIATRIC intensive care units" OR PICU                                                  | 10,655 |
|  | 4. 1 AND 2 AND 3                                                                                                               | 1      |

| Dates of coverage and database | Query                                                                                                                 | Retrieved records |
|--------------------------------|-----------------------------------------------------------------------------------------------------------------------|-------------------|
| 10/03/22<br><br>COCHRANE       | 1. ("pain"):ti,ab,kw OR ("pain assessment"):ti,ab,kw                                                                  | 215514            |
|                                | 2. ("integrative medicine"):ti,ab,kw OR ("complementary medicine"):ti,ab,kw OR ("alternative medicine"):ti,ab,kw      | 4013              |
|                                | 3. ("non-pharmacological"):ti,ab,kw AND ("therapies"):ti,ab,kw OR ("treatment"):ti,ab,kw OR ("intervention"):ti,ab,kw | 1147812           |
|                                | 4. ("aromatherapies"):ti,ab,kw OR ("essential oil"):ti,ab,kw                                                          | 2174              |
|                                | 5. ("acupuncture"):ti,ab,kw OR ("acupuncture analgesia"):ti,ab,kw                                                     | 17333             |
|                                | 6. ("mind body"):ti,ab,kw OR ("mind body medicine"):ti,ab,kw OR ("mind body therapies"):ti,ab,kw                      | 1248              |
|                                | 7. ("breathing"):ti,ab,kw                                                                                             | 34728             |
|                                | 8. ("guided imagery"):ti,ab,kw                                                                                        | 806               |

|     |                                                                                                                                                                                     |       |
|-----|-------------------------------------------------------------------------------------------------------------------------------------------------------------------------------------|-------|
| 9.  | ("hypnotherapy"):ti,ab,kw                                                                                                                                                           | 380   |
| 10. | ("biofeedback"):ti,ab,kw OR ("biofeedback training"):ti,ab,kw                                                                                                                       | 3897  |
| 11. | ("music therapy"):ti,ab,kw                                                                                                                                                          | 2613  |
| 12. | ("progressive muscle relaxation"):ti,ab,kw OR ("progressive muscle relaxation training"):ti,ab,kw                                                                                   | 820   |
| 13. | ("sleep"):ti,ab,kw                                                                                                                                                                  | 46268 |
| 14. | ("massage therapy"):ti,ab,kw                                                                                                                                                        | 875   |
| 15. | ("physical therapy"):ti,ab,kw OR ("physical therapy                                                                                                                                 | 11504 |
| 16. | ("pediatric intensive care unit"):ti,ab,kw OR ("paediatric intensive care"):ti,ab,kw OR ("paediatric intensive care unit"):ti,ab,kw OR ("paediatric intensive care units"):ti,ab,kw | 1095  |
| 17. | 1 AND 2 OR 3 OR 4 OR 5 OR 6 OR 7 OR 8 OR9 OR 10 OR 11 OR 12 OR 13 OR 14 OR 15 AND 16                                                                                                | 0     |
| 18. | 1 AND 3 AND 16                                                                                                                                                                      | 46    |
| 19. | 1 AND 7 AND 16                                                                                                                                                                      | 10    |
| 20. | 1 AND 11 AND 16                                                                                                                                                                     | 2     |
| 21. | 1 AND 13 AND 16                                                                                                                                                                     | 5     |
| 22. | 1 AND 15 AND 16                                                                                                                                                                     | 1     |



|  |                                                                                               |    |
|--|-----------------------------------------------------------------------------------------------|----|
|  | 23. 1 AND 3 AND 16 OR 1 AND 7 AND 16 OR 1 AND 11 AND 16 OR 1 AND 13 AND 16 OR 1 AND 15 AND 16 | 47 |
|--|-----------------------------------------------------------------------------------------------|----|

| Dates of coverage and database | Query                                                                                                                                                                                                                                                                                                                                                                                                                                                                                                                                                                                                                                                                                    | Retrieved records |
|--------------------------------|------------------------------------------------------------------------------------------------------------------------------------------------------------------------------------------------------------------------------------------------------------------------------------------------------------------------------------------------------------------------------------------------------------------------------------------------------------------------------------------------------------------------------------------------------------------------------------------------------------------------------------------------------------------------------------------|-------------------|
| 10/23/22<br>EMBASE             | 1. pain'/exp OR 'pain' OR 'analgesia'/exp OR 'analgesia'                                                                                                                                                                                                                                                                                                                                                                                                                                                                                                                                                                                                                                 | 2062548           |
|                                | 2. 'integrative medicine'/exp OR 'integrative medicine' OR 'alternative medicine'/exp OR 'alternative medicine' OR 'aromatherapy'/exp OR 'aromatherapy' OR 'essential oil'/exp OR 'essential oil' OR 'acupuncture'/exp OR 'acupuncture' OR 'auricular acupuncture'/exp OR 'auricular acupuncture' OR 'breathing exercise'/exp OR 'breathing exercise' OR 'guided imagery'/exp OR 'guided imagery' OR 'hypnosis'/exp OR 'hypnosis' OR 'biofeedback'/exp OR 'biofeedback' OR 'music therapy'/exp OR 'music therapy' OR 'muscle relaxation'/exp OR 'muscle relaxation' OR 'sleep quality'/exp OR 'sleep quality' OR 'massage'/exp OR 'massage' OR 'physiotherapy'/exp OR 'physiotherapy' OR | 255690            |
|                                | 3. 'pediatric intensive care unit'/exp OR 'pediatric intensive care unit'                                                                                                                                                                                                                                                                                                                                                                                                                                                                                                                                                                                                                | 22687             |
|                                | 4. 1 AND 2 AND 3                                                                                                                                                                                                                                                                                                                                                                                                                                                                                                                                                                                                                                                                         | 33                |

| Dates of coverage and database | Query                                                                                                                                                                                                                                                                                         | Retrieved records |
|--------------------------------|-----------------------------------------------------------------------------------------------------------------------------------------------------------------------------------------------------------------------------------------------------------------------------------------------|-------------------|
| 10/23/22<br>LILACS             | 1. "DOR" or "avaliacao da DOR" or "escala analogica da DOR" or "escala analogica visual de DOR" or "intensidade da DOR" or "limiar da DOR" or "manejo da DOR" or "medicao da DOR" or "percepcao da DOR" or "unidades de alivio da DOR" or "DOR aguda" or "DOR cronica" [Descritor de assunto] | 5862              |

|  |                                                                                                 |      |
|--|-------------------------------------------------------------------------------------------------|------|
|  | 2. "TERAPIAS COMPLEMENTARES" or "TERAPIAS COMPLEMENTARES e integrativas" [Descritor de assunto] | 1429 |
|  | 3. "unidade de terapia intensiva pediatria" [Descritor de assunto]                              | 767  |
|  | 4. 1 and 2 and 3                                                                                | 0    |

| Dates of coverage and database | Query                                                               | Retrieved records |
|--------------------------------|---------------------------------------------------------------------|-------------------|
| SCIENCE DIRECT                 | 1. Title, abstract, keyword: pain                                   | 232,587           |
|                                | 2. Title, abstract, keyword: complementary and alternative medicine | 3342              |
|                                | 3. Title, abstract, keyword: integrative medicine                   | 6951              |
|                                | 4. pediatric intensive care unit                                    | 3787              |
|                                | 1 AND 2 OR 3 AND 4                                                  | 267               |

| Dates of coverage and database | Query                                                                                                                                                                                                                                                                                                                                                                                                                                                                                                                                                                                                       | Retrieved records |
|--------------------------------|-------------------------------------------------------------------------------------------------------------------------------------------------------------------------------------------------------------------------------------------------------------------------------------------------------------------------------------------------------------------------------------------------------------------------------------------------------------------------------------------------------------------------------------------------------------------------------------------------------------|-------------------|
| 09/23/22<br><br>SCOPUS         | 1. TITLE(“Pain Management” OR “Pain Relief “OR “Pain Control” OR “Pain Reduction” OR “Managing Pain” OR Analgesia) OR ABS(“Pain Management” OR “Pain Relief” OR “Pain Control” OR “Pain Reduction” OR “Managing Pain” OR Analgesia) OR TITLE-ABS-KEY(Pain Management OR Pain Relief OR Pain Control OR “Pain Reduction” OR “Managing Pain” OR Analgesia)                                                                                                                                                                                                                                                    | (344,701)         |
|                                | 2. TITLE(“Pain Assessment” OR “Pain Scale” OR “Pain Tool” OR “Pain Assessment Tool” OR “Pain Instrument” OR “Pain Intervention” OR “Pain Measurement”) OR ABS(“Pain Assessment” OR “Pain Scale” OR “Pain Tool” OR “Pain Assessment Tool” OR “Pain Instrument” OR “Pain Intervention” OR “Pain Measurement”) OR TITLE-ABS-KEY(“Pain Assessment” OR “Pain Scale” OR “Pain Tool” OR “Pain Assessment Tool” OR “Pain Instrument” OR “Pain Intervention” OR “Pain Measurement”)                                                                                                                                  | (145,947)         |
|                                | 3. 1 OR 2                                                                                                                                                                                                                                                                                                                                                                                                                                                                                                                                                                                                   | (423,690)         |
|                                | 4. TITLE(“Integrative Medicine” OR “Complementary Medicine” OR “Alternative Medicine”) OR ABS(“Integrative Medicine” OR “Complementary Medicine” OR “Alternative Medicine”) OR TITLE-ABS-KEY(“Integrative Medicine” OR “Complementary Medicine” OR “Alternative Medicine”)                                                                                                                                                                                                                                                                                                                                  | (58,538)          |
|                                | 5. TITLE(“Integrative Therapy” OR “Integrative Therapies” OR “Complementary Therapy” OR “Complementary Therapies” OR “Alternative Therapy” OR “Alternative Therapies” OR “Alternative Treatment”) OR ABS(“Integrative Therapy” OR “Integrative Therapies” OR “Complementary Therapy” OR “Complementary Therapies” OR “Alternative Therapy” OR “Alternative Therapies” OR “Alternative Treatment”) OR TITLE-ABS-KEY(“Integrative Therapy” OR “Integrative Therapies” OR “Complementary Therapy” OR “Complementary Therapies” OR “Alternative Therapy” OR “Alternative Therapies” OR “Alternative Treatment”) | (59,454)          |

|  |                                                                                                                                                                                                                                                                                                                                                                                                                                                                                                                                                                                        |           |
|--|----------------------------------------------------------------------------------------------------------------------------------------------------------------------------------------------------------------------------------------------------------------------------------------------------------------------------------------------------------------------------------------------------------------------------------------------------------------------------------------------------------------------------------------------------------------------------------------|-----------|
|  | 6. TITLE(“Non-pharmacological Intervention” OR “Non-pharmacological Interventions” OR “Non-pharmacological Therapy” OR “Non-pharmacological Therapies” OR “Non-pharmacological Treatment”) OR ABS(“Non-pharmacological Intervention” OR “Non-pharmacological Interventions” OR “Non-pharmacological Therapy” OR “Non-pharmacological Therapies” OR “Non-pharmacological Treatment”) OR TITLE-ABS-KEY(“Non-pharmacological Intervention” OR “Non-pharmacological Interventions” OR “Non-pharmacological Therapy” OR “Non-pharmacological Therapies” OR “Non-pharmacological Treatment”) | (7,752)   |
|  | 7. TITLE(Aromatherapy OR “Essential Oils” OR Aroma therapy) OR ABS(Aromatherapy OR “Essential Oils” OR Aroma therapy) OR TITLE-ABS-KEY(Aromatherapy OR “Essential Oils” OR Aroma therapy)                                                                                                                                                                                                                                                                                                                                                                                              | (3.885)   |
|  | 8. TITLE(“Acupuncture” OR “Acupuncture Therapy” OR “Acupuncture Treatment”) OR ABS (“Acupuncture” OR “Acupuncture Therapy” OR “Acupuncture Treatment”) OR TITLE-ABS-KEY(“Acupuncture” OR “Acupuncture Therapy” OR “Acupuncture Treatment”)                                                                                                                                                                                                                                                                                                                                             | (52,587)  |
|  | 9. TITLE(“Acupuncture, Ear”) OR ABS(“Acupuncture, Ear”) OR TITLE-ABS-KEY(“Acupuncture, Ear”)                                                                                                                                                                                                                                                                                                                                                                                                                                                                                           | (452)     |
|  | 10. TITLE(“Mind Body Techniques” OR “Mind-body Therapies”) OR ABS(“Mind Body Techniques” OR “Mind-body Therapies”) OR TITLE-ABS-KEY(“Mind Body Techniques” OR “Mind-body Therapies”)                                                                                                                                                                                                                                                                                                                                                                                                   | (1.625)   |
|  | 11. TITLE(“Breathing Techniques”OR Breathing OR “Breathing Exercise”) OR ABS(“Breathing Techniques”OR Breathing OR “Breathing Exercise”) OR TITLE-ABS-KEY(“Breathing Techniques”OR Breathing OR “Breathing Exercise”)                                                                                                                                                                                                                                                                                                                                                                  | (279.806) |
|  | 12. TITLE(“Guided Imagery for Pain Management” OR “Guided Image Therapy” OR “Guided Images Therapies”) OR ABS(“Guided Imagery for Pain Management” OR “Guided Image Therapy” OR “Guided Images Therapies”) OR TITLE-ABS-KEY(“Guided Imagery for Pain Management” OR “Guided Image Therapy” OR “Guided Images Therapies”)                                                                                                                                                                                                                                                               | 4         |
|  | 13. TITLE(“Guided Imagery” OR “Guided Relaxation” OR “Visualization Techniques”) OR ABS(“Guided Imagery” OR “Guided Relaxation” OR “Visualization Techniques”) OR TITLE-ABS-KEY(“Guided Imagery” OR “Guided Relaxation” OR “Visualization Techniques”)                                                                                                                                                                                                                                                                                                                                 | 17,176    |

|  |                                                                                                                                                                                                                                                                                                                                                                                                                                                           |         |
|--|-----------------------------------------------------------------------------------------------------------------------------------------------------------------------------------------------------------------------------------------------------------------------------------------------------------------------------------------------------------------------------------------------------------------------------------------------------------|---------|
|  | 14. TITLE(Hypnosis OR Hypnotherapy) OR ABS(Hypnosis OR Hypnotherapy) OR TITLE-ABS-KEY(Hypnosis OR Hypnotherapy)                                                                                                                                                                                                                                                                                                                                           | 22,266  |
|  | 15. TITLE(Biofeedback OR “Biofeedback Therapy”) OR ABS(Biofeedback OR “Biofeedback Therapy”) OR TITLE-ABS-KEY(Biofeedback OR “Biofeedback Therapy”)                                                                                                                                                                                                                                                                                                       | 17,108  |
|  | 16. TITLE(“Music Therapy” OR “Music Intervention” OR “Musical Therapy” OR “Music-based Intervention” OR “Therapeutic Music”) OR ABS(“Music Therapy” OR “Music Intervention” OR “Musical Therapy” OR “Music-based Intervention” OR “Therapeutic Music”) OR TITLE-ABS-KEY(“Music Therapy” OR “Music Intervention” OR “Musical Therapy” OR “Music-based Intervention” OR “Therapeutic Music”)                                                                | 11,454  |
|  | 17. TITLE(“Progressive Muscle Relaxation” OR “Muscle Relaxation”) OR ABS(“Progressive Muscle Relaxation” OR “Muscle Relaxation”) OR TITLE-ABS-KEY(“Progressive Muscle Relaxation” OR “Muscle Relaxation”)                                                                                                                                                                                                                                                 | 34,970  |
|  | 18. TITLE(“Sleep Therapy” OR Sleep) OR ABS(“Sleep Therapy” OR Sleep) OR TITLE-ABS-KEY(“Sleep Therapy” OR Sleep)                                                                                                                                                                                                                                                                                                                                           | 340,832 |
|  | 19. TITLE(“Massage Therapy” OR Massage OR “Massage Therapies”) OR ABS(“Massage Therapy” OR Massage OR “Massage Therapies”) OR TITLE-ABS-KEY(“Massage Therapy” OR Massage OR “Massage Therapies”)                                                                                                                                                                                                                                                          | 28,624  |
|  | 20. TITLE(“Physical Therapy” OR Physiotherapy) OR ABS(“Physical Therapy” OR Physiotherapy) OR TITLE-ABS-KEY(“Physical Therapy” OR Physiotherapy)                                                                                                                                                                                                                                                                                                          | 129,632 |
|  | 21. 4 OR 5 OR 6 OR 7 OR 8 OR 9 OR 10 OR 11 OR 12 OR 13 OR 14 OR 15 OR 16 OR 17 OR 18 OR 19 OR 20                                                                                                                                                                                                                                                                                                                                                          | 937,453 |
|  | 22. TITLE(“Pediatric Intensive Care Unit” OR PICU OR “Pediatric Critical Care Unit” OR “Paediatric Intensive Care” OR “Paediatric Critical Care”) OR ABS(“Pediatric Intensive Care Unit” OR PICU OR “Pediatric Critical Care Unit” OR “Paediatric Intensive Care” OR “Paediatric Critical Care”) OR TITLE-ABS-KEY(“Pediatric Intensive Care Unit” OR PICU OR “Pediatric Critical Care Unit” OR “Paediatric Intensive Care” OR “Paediatric Critical Care”) | 20,379  |

|  |                                                                                                                                            |        |
|--|--------------------------------------------------------------------------------------------------------------------------------------------|--------|
|  | 23. TITLE(“Intensive Care Units, Pediatric”) OR ABS(“Intensive Care Units, Pediatric”) OR TITLE-ABS-KEY(“Intensive Care Units, Pediatric”) | 8,226  |
|  | 24. 22 OR 23                                                                                                                               | 22,008 |
|  | 25. 3 AND 21 AND 24                                                                                                                        | 31     |

| Dates of coverage and database | Query                                                                                                                                                                                                                                                                                                                                                                                                                   | Retrieved records |
|--------------------------------|-------------------------------------------------------------------------------------------------------------------------------------------------------------------------------------------------------------------------------------------------------------------------------------------------------------------------------------------------------------------------------------------------------------------------|-------------------|
| 09/21/22<br><br>WEB OF SCIENCE | 1. TS= (pain management or pain relief or pain control or pain reduction or managing pain or analgesia) OR TI= (pain management or pain relief or pain control or pain reduction or managing pain or analgesia) OR AB= (pain management or pain relief or pain control or pain reduction or managing pain or analgesia)                                                                                                 | (376,576)         |
|                                | 2. TS= (pain assessment or pain scale or pain tool or pain assessment tool or pain instrument or pain intervention or pain measurement) OR TI= (pain assessment or pain scale or pain tool or pain assessment tool or pain instrument or pain intervention or pain measurement) OR AB= (pain assessment or pain scale or pain tool or pain assessment tool or pain instrument or pain intervention or pain measurement) | (241,031)         |
|                                | 3. 1 OR 2                                                                                                                                                                                                                                                                                                                                                                                                               | (475,359)         |
|                                | 4. TS= (integrative medicine or complementary medicine or alternative medicine) OR TI= (integrative medicine or complementary medicine or alternative medicine) OR AB= (Integrative medicine or complementary medicine or alternative medicine)                                                                                                                                                                         | (51,961)          |

|  |                                                                                                                                                                                                                                                                                                                                                                                                                                                                                                                                                           |           |
|--|-----------------------------------------------------------------------------------------------------------------------------------------------------------------------------------------------------------------------------------------------------------------------------------------------------------------------------------------------------------------------------------------------------------------------------------------------------------------------------------------------------------------------------------------------------------|-----------|
|  | 5. TS= (integrative therapy or integrative therapies or complementary therapy or complementary therapies or alternative therapy or alternative therapies or alternative treatment) OR TI= (integrative therapy or integrative therapies or complementary therapy or complementary therapies or alternative therapy or alternative therapies or alternative treatment ) OR AB= (Integrative therapy or integrative therapies or complementary therapy or complementary therapies or alternative therapy or alternative therapies or alternative treatment) | (288,290) |
|  | 6. TS= (non- pharmacological intervention or non-pharmacological interventions or non-pharmacological therapy or non-pharmacological therapies or non-pharmacological treatment) OR TI= (non- pharmacological intervention or non-pharmacological interventions or non-pharmacological therapy or non-pharmacological therapies or non-pharmacological treatment) OR AB= (non- pharmacological intervention or non-pharmacological interventions or non-pharmacological therapy or non-pharmacological therapies or non-pharmacological treatment)        | (12,420)  |
|  | 7. TS= (aromatherapy or essential oils or aroma therapy) OR TI= (aromatherapy or essential oils or aroma therapy) OR AB= (aromatherapy or essential oils or aroma therapy)                                                                                                                                                                                                                                                                                                                                                                                | (86,864)  |
|  | 8. TS= (acupuncture or acupuncture therapy or acupuncture treatment) OR TI= (acupuncture or acupuncture therapy or acupuncture treatment) OR AB= (acupuncture or acupuncture therapy or acupuncture treatment)                                                                                                                                                                                                                                                                                                                                            | (25,368)  |
|  | 9. TS= (acupuncture, ear) OR TI= (acupuncture, ear) OR AB= (acupuncture, ear)                                                                                                                                                                                                                                                                                                                                                                                                                                                                             | (547)     |
|  | 10. TS= (mind body techniques or mind-body therapies) OR TI= (mind body techniques or mind-body therapies) OR AB= (mind body techniques or mind-body therapies)                                                                                                                                                                                                                                                                                                                                                                                           | (2,430)   |
|  | 11. TS= (breathing techniques or breathing or breathing exercise) OR TI= (breathing techniques or breathing or breathing exercise) OR AB= (breathing techniques or breathing or breathing exercise)                                                                                                                                                                                                                                                                                                                                                       | (99,065)  |
|  | 12. TS= (guided imagery for pain management or guided image therapy or guided images therapies) OR TI= (guided imagery for pain management or guided image therapy or guided images therapies) OR AB= (guided imagery for pain management or guided image therapy or guided images therapies)                                                                                                                                                                                                                                                             | (22,227)  |

|  |                                                                                                                                                                                                                                                                                                                                                                                                                          |             |
|--|--------------------------------------------------------------------------------------------------------------------------------------------------------------------------------------------------------------------------------------------------------------------------------------------------------------------------------------------------------------------------------------------------------------------------|-------------|
|  | 13. TS= (guided imagery or guided relaxation or visualization techniques) OR TI= (guided imagery or guided relaxation or visualization techniques) OR AB= (guided imagery or guided relaxation or visualization techniques)                                                                                                                                                                                              | (68,289)    |
|  | 14. TS= (hypnosis or hypnotherapy) OR TI= (hypnosis or hypnotherapy) OR AB= (hypnosis or hypnotherapy)                                                                                                                                                                                                                                                                                                                   | (10,831)    |
|  | 15. TS= (biofeedback or biofeedback therapy) OR TI= (biofeedback or biofeedback therapy) OR AB= (biofeedback or biofeedback therapy)                                                                                                                                                                                                                                                                                     | (12,661)    |
|  | 16. TS= (music therapy or music intervention or musical therapy or music-based intervention or therapeutic music) OR TI= (music therapy or music intervention or musical therapy or music-based intervention or therapeutic music) OR AB= (music therapy or music intervention or musical therapy or music-based intervention or therapeutic music)                                                                      | (11,018)    |
|  | 17. TS= (progressive muscle relaxation or muscle relaxation) OR TI= (progressive muscle relaxation or muscle relaxation) OR AB= (progressive muscle relaxation or muscle relaxation)                                                                                                                                                                                                                                     | (33,638)    |
|  | 18. TS= (sleep therapy or sleep) OR TI= (sleep therapy or sleep) OR AB= (sleep therapy or sleep)                                                                                                                                                                                                                                                                                                                         | (293,420)   |
|  | 19. TS= (massage therapy or massage or massage therapies) OR TI= (massage therapy or massage or massage therapies) OR AB= (massage therapy or massage or massage therapies)                                                                                                                                                                                                                                              | (11,659)    |
|  | 20. TS= (physical therapy or physiotherapy) OR TI= (physical therapy or physiotherapy) OR AB= (physical therapy or physiotherapy)                                                                                                                                                                                                                                                                                        | (121,548)   |
|  | 21. 4 OR 5 OR 6 OR 7 OR 8 OR 9 OR 10 OR 11 OR 12 OR 13 OR 14 OR 15 OR 16 OR 17 OR 18 OR 19 OR 20                                                                                                                                                                                                                                                                                                                         | (1,058,477) |
|  | 22. TS= (pediatric intensive care unit or picu or pediatric critical care unit or paediatric intensive care or paediatric critical care) OR TI= (pediatric intensive care unit or picu or pediatric critical care unit or paediatric intensive care or paediatric critical care) OR AB= (pediatric intensive care unit or picu or pediatric critical care unit or paediatric intensive care or paediatric critical care) | (21,834)    |



|  |                                                                                                                             |          |
|--|-----------------------------------------------------------------------------------------------------------------------------|----------|
|  | 23. TS= (intensive care units, pediatric) OR TI= (intensive care units, pediatric) OR AB= (intensive care units, pediatric) | (14,677) |
|  | 24. 22 OR 23                                                                                                                | (21,834) |
|  | 25. 3 AND 21 AND 24                                                                                                         | (137)    |

| Dates of coverage and database                           | Query                                                                                                                                                                                                                                                                                                                                                                                                                                                 | Retrieved records |
|----------------------------------------------------------|-------------------------------------------------------------------------------------------------------------------------------------------------------------------------------------------------------------------------------------------------------------------------------------------------------------------------------------------------------------------------------------------------------------------------------------------------------|-------------------|
| 09/26/22<br><br>Catálogo de Teses e Dissertações (CAPES) | 1. (“Pain Management” OR “Pain Relief“OR “Pain Control” OR “Pain Reduction” OR “Managing Pain” OR Analgesia) OR (“Pain Management” OR “Pain Relief” OR “Pain Control” OR “Pain Reduction” OR “Managing Pain” OR Analgesia) OR(Pain Management OR Pain Relief OR Pain Control OR “Pain Reduction” OR “Managing Pain” OR Analgesia)                                                                                                                     | 47.919            |
|                                                          | 2. (“Pain Assessment” OR “Pain Scale” OR “Pain Tool” OR “Pain Assessment Tool” OR “Pain Instrument” OR “Pain Intervention” OR “Pain Measurement”) OR (“Pain Assessment” OR “Pain Scale” OR “Pain Tool” OR “Pain Assessment Tool” OR “Pain Instrument” OR “Pain Intervention” OR “Pain Measurement”) OR (“Pain Assessment” OR “Pain Scale” OR “Pain Tool” OR “Pain Assessment Tool” OR “Pain Instrument” OR “Pain Intervention” OR “Pain Measurement”) | 17.688            |
|                                                          | 3. 1 OR 2                                                                                                                                                                                                                                                                                                                                                                                                                                             | 60.914            |
|                                                          | 4. (“Integrative Medicine” OR “Complementary Medicine” OR “Alternative Medicine”) OR (“Integrative Medicine” OR “Complementary Medicine” OR “Alternative Medicine”) OR (“Integrative Medicine” OR “Complementary Medicine” OR “Alternative Medicine”)                                                                                                                                                                                                 | 5.309             |

|  |                                                                                                                                                                                                                                                                                                                                                                                                                                                                                                                                                                                        |        |
|--|----------------------------------------------------------------------------------------------------------------------------------------------------------------------------------------------------------------------------------------------------------------------------------------------------------------------------------------------------------------------------------------------------------------------------------------------------------------------------------------------------------------------------------------------------------------------------------------|--------|
|  | 5. (“Integrative Therapy” OR “Integrative Therapies” OR “Complementary Therapy” OR “Complementary Therapies” OR “Alternative Therapy” OR “Alternative Therapies” OR “Alternative Treatment”) OR (“Integrative Therapy” OR “Integrative Therapies” OR “Complementary Therapy” OR “Complementary Therapies” OR “Alternative Therapy” OR “Alternative Therapies” OR “Alternative Treatment”) OR (“Integrative Therapy” OR “Integrative Therapies” OR “Complementary Therapy” OR “Complementary Therapies” OR “Alternative Therapy” OR “Alternative Therapies” OR “Alternative Treatment”) | 14.345 |
|  | 6. (“Non-pharmacological Intervention” OR “Non-pharmacological Interventions” OR “Non-pharmacological Therapy” OR “Non-pharmacological Therapies” OR “Non-pharmacological Treatment”) OR (“Non-pharmacological Intervention” OR “Non-pharmacological Interventions” OR “Non-pharmacological Therapy” OR “Non-pharmacological Therapies” OR “Non-pharmacological Treatment”) OR (“Non-pharmacological Intervention” OR “Non-pharmacological Interventions” OR “Non-pharmacological Therapy” OR “Non-pharmacological Therapies” OR “Non-pharmacological Treatment”)                      | 20.398 |
|  | 7. (Aromatherapy OR “Essential Oils” OR Aroma therapy) OR (Aromatherapy OR “Essential Oils” OR Aroma therapy) OR (Aromatherapy OR “Essential Oils” OR Aroma therapy)                                                                                                                                                                                                                                                                                                                                                                                                                   | 8.734  |
|  | 8. (“Acupuncture” OR “Acupuncture Therapy” OR “Acupuncture Treatment”) OR (“Acupuncture” OR “Acupuncture Therapy” OR “Acupuncture Treatment”) OR (“Acupuncture” OR “Acupuncture Therapy” OR “Acupuncture Treatment”)                                                                                                                                                                                                                                                                                                                                                                   | 11.097 |
|  | 9. (“Acupuncture, Ear”) OR (“Acupuncture, Ear”) OR (“Acupuncture, Ear”)                                                                                                                                                                                                                                                                                                                                                                                                                                                                                                                | 468    |
|  | 10. (“Mind Body Techniques” OR “Mind-body Therapies”) OR (“Mind Body Techniques” OR “Mind-body Therapies”) OR (“Mind Body Techniques” OR “Mind-body Therapies”)                                                                                                                                                                                                                                                                                                                                                                                                                        | 8.897  |
|  | 11. (“Breathing Techniques”OR Breathing OR “Breathing Exercise”) OR (“Breathing Techniques”OR Breathing OR “Breathing Exercise”) OR (“Breathing Techniques”OR Breathing OR “Breathing Exercise”)                                                                                                                                                                                                                                                                                                                                                                                       | 12.400 |
|  | 12. (“Guided Imagery for Pain Management” OR “Guided Image Therapy” OR “Guided Images Therapies”) OR (“Guided Imagery for Pain Management” OR “Guided Image Therapy” OR “Guided Images Therapies”) OR (“Guided Imagery for Pain Management” OR “Guided Image Therapy” OR “Guided Images Therapies”)                                                                                                                                                                                                                                                                                    | 63.039 |

|  |                                                                                                                                                                                                                                                                                                                                                                       |         |
|--|-----------------------------------------------------------------------------------------------------------------------------------------------------------------------------------------------------------------------------------------------------------------------------------------------------------------------------------------------------------------------|---------|
|  | 13. (“Guided Imagery” OR “Guided Relaxation” OR “Visualization Techniques”) OR (“Guided Imagery” OR “Guided Relaxation” OR “Visualization Techniques”) OR (“Guided Imagery” OR “Guided Relaxation” OR “Visualization Techniques”)                                                                                                                                     | 3.632   |
|  | 14. (Hypnosis OR Hypnotherapy) OR (Hypnosis OR Hypnotherapy) OR (Hypnosis OR Hypnotherapy)                                                                                                                                                                                                                                                                            | 19      |
|  | 15. (Biofeedback OR “Biofeedback Therapy”) OR (Biofeedback OR “Biofeedback Therapy”) OR (Biofeedback OR “Biofeedback Therapy”)                                                                                                                                                                                                                                        | 5.433   |
|  | 16. (“Music Therapy” OR “Music Intervention” OR “Musical Therapy” OR “Music-based Intervention” OR “Therapeutic Music”) OR (“Music Therapy” OR “Music Intervention” OR “Musical Therapy” OR “Music-based Intervention” OR “Therapeutic Music”) OR (“Music Therapy” OR “Music Intervention” OR “Musical Therapy” OR “Music-based Intervention” OR “Therapeutic Music”) | 25.370  |
|  | 17. (“Progressive Muscle Relaxation” OR “Muscle Relaxation”) OR (“Progressive Muscle Relaxation” OR “Muscle Relaxation”) OR (“Progressive Muscle Relaxation” OR “Muscle Relaxation”)                                                                                                                                                                                  | 2.847   |
|  | 18. (“Sleep Therapy” OR Sleep) OR (“Sleep Therapy” OR Sleep) OR (“Sleep Therapy” OR Sleep)                                                                                                                                                                                                                                                                            | 13.033  |
|  | 19. (“Massage Therapy” OR Massage OR “Massage Therapies”) OR (“Massage Therapy” OR Massage OR “Massage Therapies”) OR (“Massage Therapy” OR Massage OR “Massage Therapies”)                                                                                                                                                                                           | 5.587   |
|  | 20. (“Physical Therapy” OR Physiotherapy) OR (“Physical Therapy” OR Physiotherapy) OR (“Physical Therapy” OR Physiotherapy)                                                                                                                                                                                                                                           | 13.679  |
|  | 21. 4 OR 5 OR 6 OR 7 OR 8 OR 9 OR 10 OR 11 OR 12 OR 13 OR 14 OR 15 OR 16 OR 17 OR 18 OR 19 OR 20                                                                                                                                                                                                                                                                      | 120.654 |

|  |                                                                                                                                                                                                                                                                                                                                                                                                                                      |        |
|--|--------------------------------------------------------------------------------------------------------------------------------------------------------------------------------------------------------------------------------------------------------------------------------------------------------------------------------------------------------------------------------------------------------------------------------------|--------|
|  | 22. (“Pediatric Intensive Care Unit” OR PICU OR “Pediatric Critical Care Unit” OR “Paediatric Intensive Care” OR “Paediatric Critical Care”) OR (“Pediatric Intensive Care Unit” OR PICU OR “Pediatric Critical Care Unit” OR “Paediatric Intensive Care” OR “Paediatric Critical Care”) OR (“Pediatric Intensive Care Unit” OR PICU OR “Pediatric Critical Care Unit” OR “Paediatric Intensive Care” OR “Paediatric Critical Care”) | 21.859 |
|  | 23. (“Intensive Care Units, Pediatric”) OR (“Intensive Care Units, Pediatric”) OR (“Intensive Care Units, Pediatric”)                                                                                                                                                                                                                                                                                                                | 16.055 |
|  | 24. 22 OR 23                                                                                                                                                                                                                                                                                                                                                                                                                         | 22.946 |

| Dates of coverage and database | Query                                                                                                   | Retrieved records |
|--------------------------------|---------------------------------------------------------------------------------------------------------|-------------------|
| 11/05/22<br><br>DART-E         | 1. pain                                                                                                 | 547               |
|                                | 2. “"complementary therapies" OR "alternative medicine" OR "integrative medicine" OR nonpharmacological | 168               |
|                                | 3. "pediatric intensive care unit" or "paediatric intensive care unit"                                  | 51                |
|                                | 4. 1 AND 2 AND 3                                                                                        | 38                |

| Dates of coverage and database | Query                                                                                                                                           | Retrieved records |
|--------------------------------|-------------------------------------------------------------------------------------------------------------------------------------------------|-------------------|
| 11/05/22<br><br>Google Scholar | 1. "complementary therapies" OR "integrative medicine" OR "complementary and alternative medicine" OR "complementary and alternative therapies" | 17900             |
|                                | 2. nonpharmacologic                                                                                                                             | 77700             |
|                                | 3. "pediatric intensive care" OR "paediatric intensive care"                                                                                    | 17600             |
|                                | 4. 1 OR 2 AND 3 AND doc OR .txt OR .rtf OR .PDF OR .html                                                                                        | 124               |

| Dates of coverage and database | Query                                                                                                  | Retrieved records |
|--------------------------------|--------------------------------------------------------------------------------------------------------|-------------------|
| 11/05/22<br><br>OATD           | 1. pain                                                                                                | 38650             |
|                                | 2. "complementary therapies" OR "alternative medicine" OR "integrative medicine" OR nonpharmacological | 1819              |
|                                | 3. "pediatric intensive care unit" or "paediatric intensive care unit"                                 | 382               |

|  |                  |   |
|--|------------------|---|
|  | 4. 1 AND 2 AND 3 | 0 |
|--|------------------|---|
